# Supplementary material for: A low-cost method for monitoring snow characteristics at remote field sites
Source: Copernicus journal article supplement (doi:10.5194/tc-15-1-2021), 2021-01-04
Supplement: Supplementary file 1 [file tc-15-1-2021-supplement.pdf]

Supplement of The Cryosphere, 15, 1–15, 2021  
<https://doi.org/10.5194/tc-15-1-2021-supplement>  
© Author(s) 2021. This work is distributed under  
the Creative Commons Attribution 4.0 License.

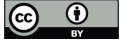

*Supplement of*

## **A low-cost method for monitoring snow characteristics at remote field sites**

**Rosamond J. Tutton and Robert G. Way**

*Correspondence to:* Robert G. Way ([robert.way@queensu.ca](mailto:robert.way@queensu.ca))

The copyright of individual parts of the supplement might differ from the CC BY 4.0 License.

## 11 Supplemental

**Table S1: Comparison between the classic iButton instrumentation (Lewkowicz, 2008) and the HOBO Pendant light/temperature loggers used in this study for the SCLT method. Only commonly used iButton models are compared. Sourced from: (a)-(c) <https://www.ibuttonlink.com/pages/maxim-integrated-products-data-sheets> (d) (Onset Computer Corporation, 2020)**

| Number               | Variable     | Storable readings | Sampling rate  | Storage capacity at 1 hr (yrs) | Logger accuracy       | Logger precision  | Operational range (°C) | Price (CAD)      | Cost per stake (CAD) |
|----------------------|--------------|-------------------|----------------|--------------------------------|-----------------------|-------------------|------------------------|------------------|----------------------|
| DS1925L <sup>a</sup> | Temperature  | 125440            | 5min to 273hrs | 14.32                          | ±0.5°C                | 0.5°C to 0.0625°C | -40 to +85             | 66.19 @ 1k units | 700                  |
| DS1922L <sup>b</sup> | Temperature  | 8192              | 1s to 273hrs   | 0.94                           | Correctible to ±0.5°C | 0.5°C to 0.0625°C | -40 to +85             | 59.52 @ 1k units | 630                  |
| DS1921G <sup>c</sup> | Temperature  | 2048              | 1min to 255min | 0.23                           | ±1°C                  | 0.5°C             | -40 to +85             | 26.64 @ 1k units | 300                  |
| MX2202 <sup>d</sup>  | Temp / Light | 98000             | 1s to 18hrs    | 11.19                          | ±0.5°C / ±10% lux     | 0.04°C / 1 lux    | -20 to +70             | 82.40 @50 units  | 1030                 |

5

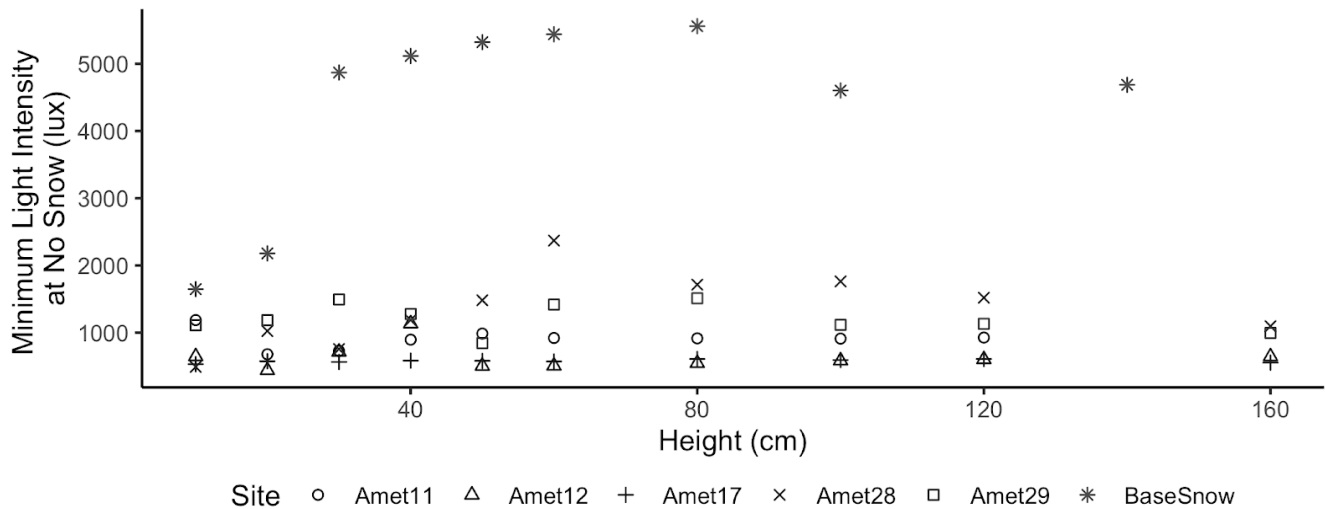

**Figure S1: Minimum light intensity at no snow conditions ( $T_{max} > 0.5^{\circ}\text{C}$ ) for each logger along every stake. These values are used as the individual logger thresholds for the changepoint analysis and for the range of thresholds used in the interpolated analysis.**

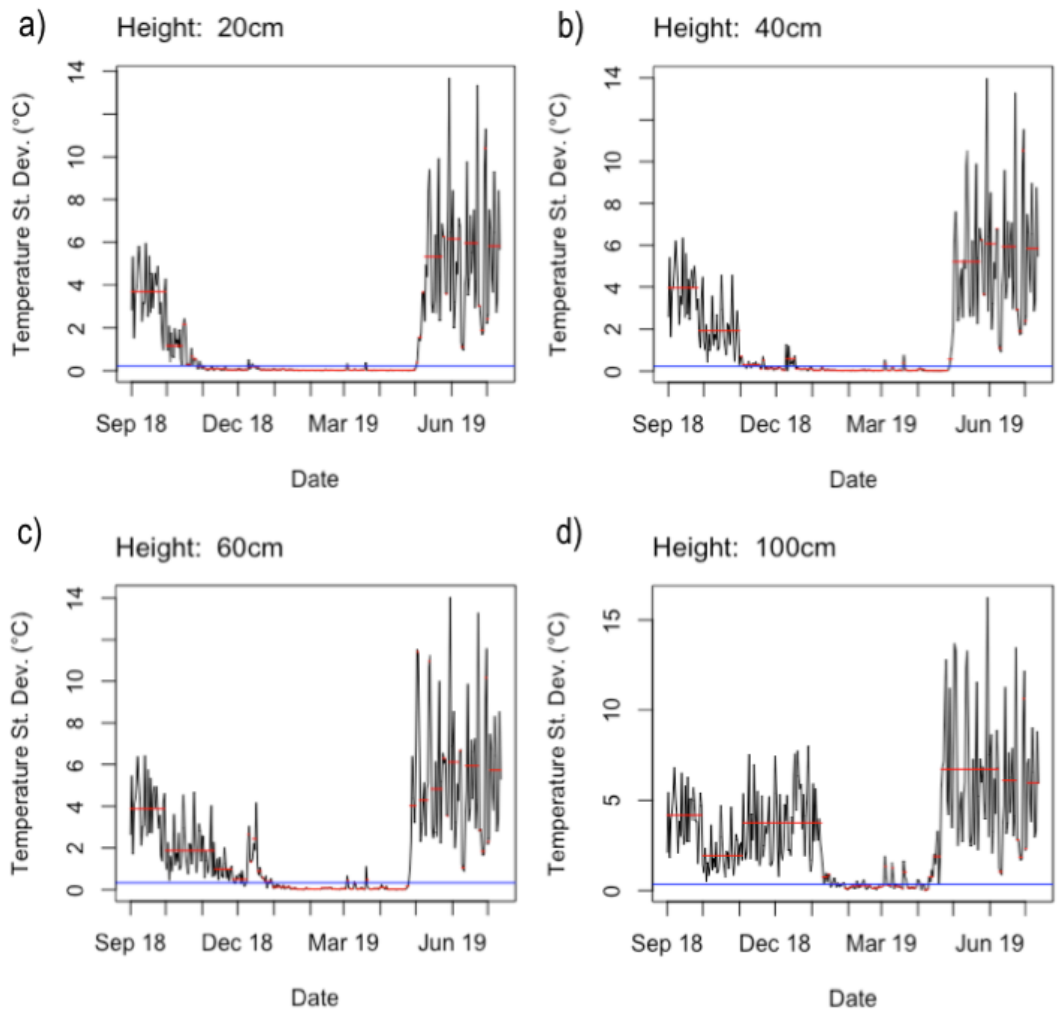

10

Figure S2: Changepoint analysis applied to (a) 20, (b) 40, (c) 60 and (d) 100 cm height loggers along Amet11. The red line shows changepoint segment means and the blue line shows the no-snow temperature standard deviation threshold for each logger. Snow cover occurs at a given logger when the changepoint segment drops below the no-snow threshold.

15

**Table S2: Mean absolute error (MAE) for the thin plate spline interpolation applied to each site. Interpolation of the light data was implemented with a logarithmic scale.**

| <b>Site</b> | <b>MAE<br/>(Daily Max Light)</b> | <b>MAE<br/>(Daily SD Light)</b> | <b>MAE<br/>(Daily Max Temp)</b> | <b>MAE<br/>(Daily SD Temp)</b> |
|-------------|----------------------------------|---------------------------------|---------------------------------|--------------------------------|
| Amet11      | 0.342 lux                        | 0.295 lux                       | 0.099°C                         | 0.94°C                         |
| Amet12      | 0.267 lux                        | 0.234 lux                       | 1.28°C                          | 0.669°C                        |
| Amet17      | 0.165 lux                        | 0.144 lux                       | 0.048°C                         | 0.399°C                        |
| Amet28      | 0.398 lux                        | 0.338 lux                       | 2.01°C                          | 1.09°C                         |
| Amet29      | 0.204 lux                        | 0.173 lux                       | 0.458°C                         | 0.488°C                        |
| BaseSnow    | 0.114 lux                        | 0.089 lux                       | 1.29°C                          | 1.41°C                         |

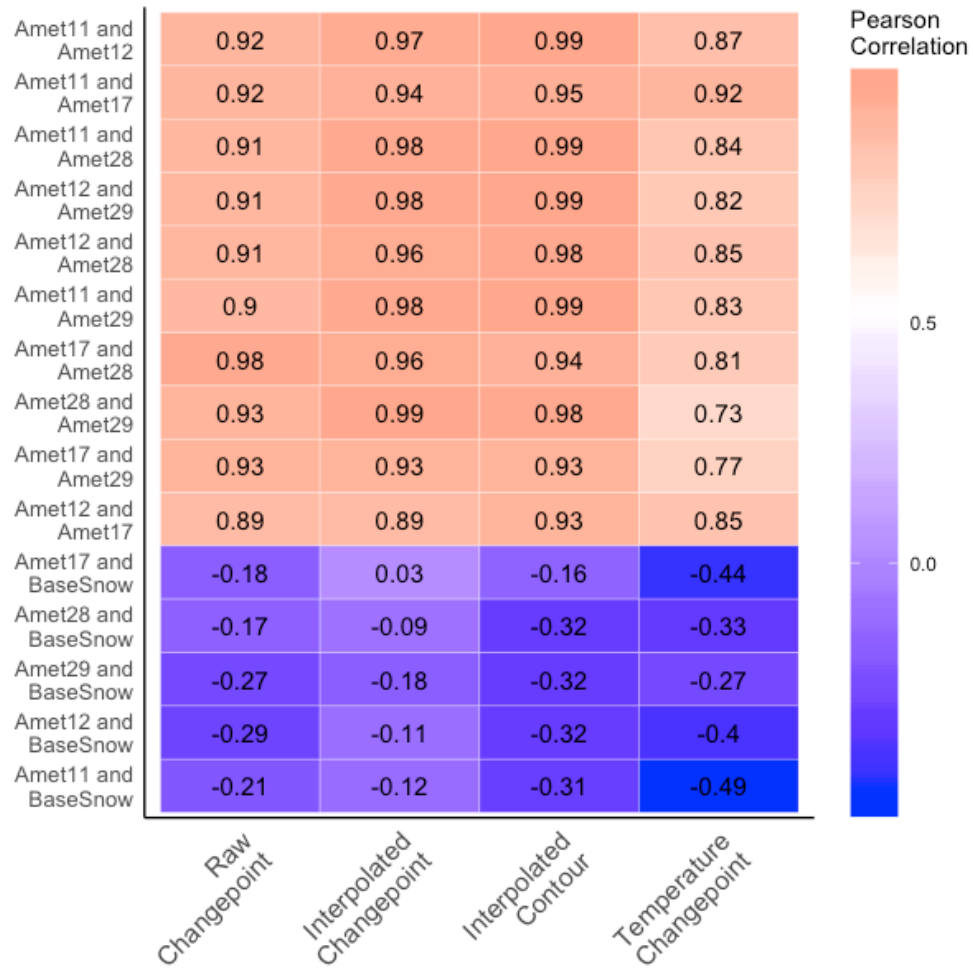

20

**Figure S3: Pearson correlation coefficients (R) comparing snow depths from December 2019 and January 2020, estimated between sites for each method.**

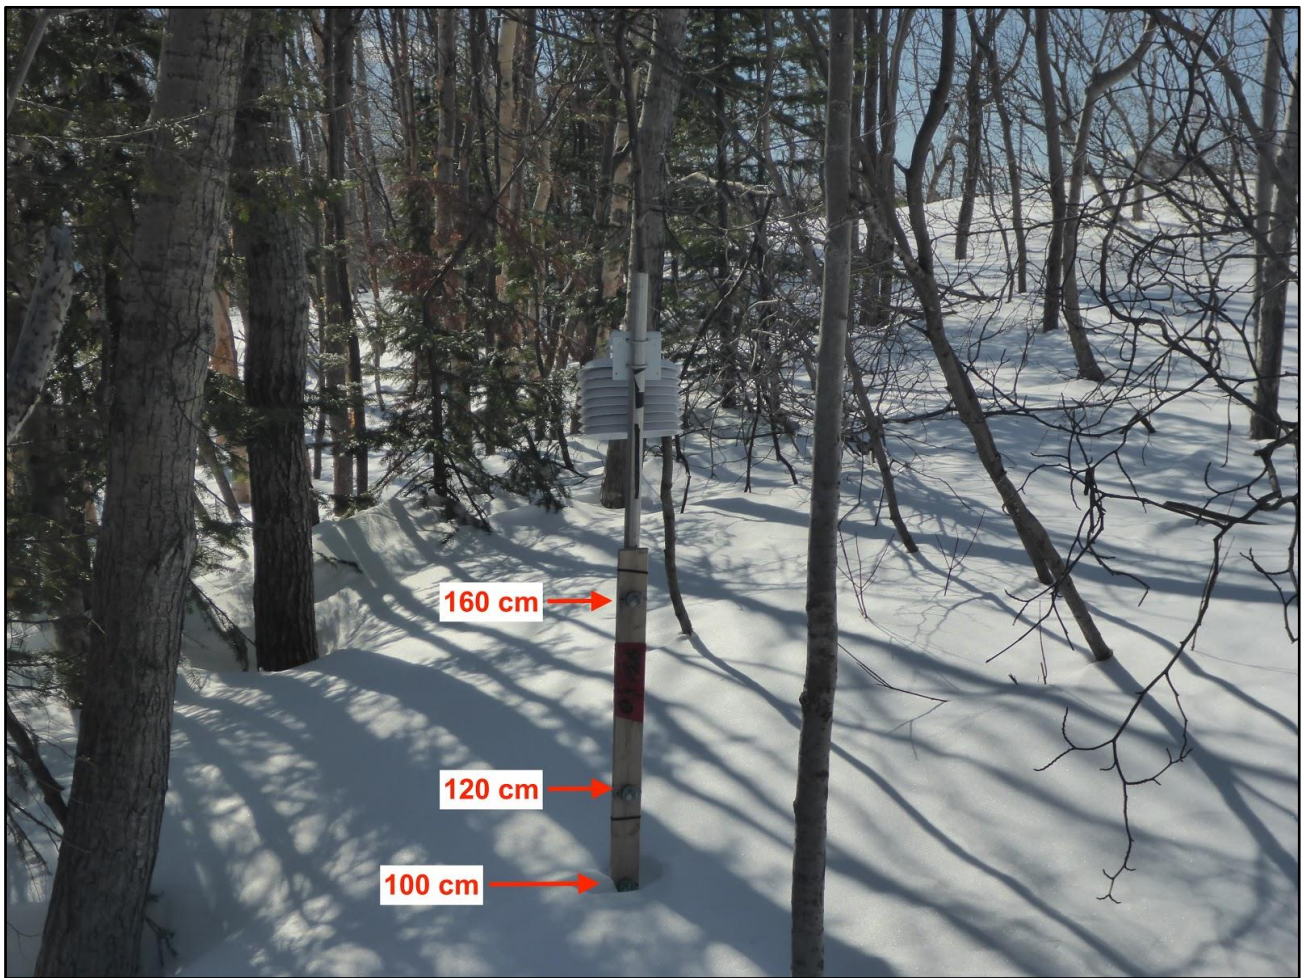

25 **Figure S4:** Photograph of Amet17 taken on March 25, 2020. Snow height was visually estimated to be  $95 \pm 5$  cm. The nearby weather station at Goose Bay Airport (~5 km distance) contemporaneously recorded a snow depth of 52 cm.

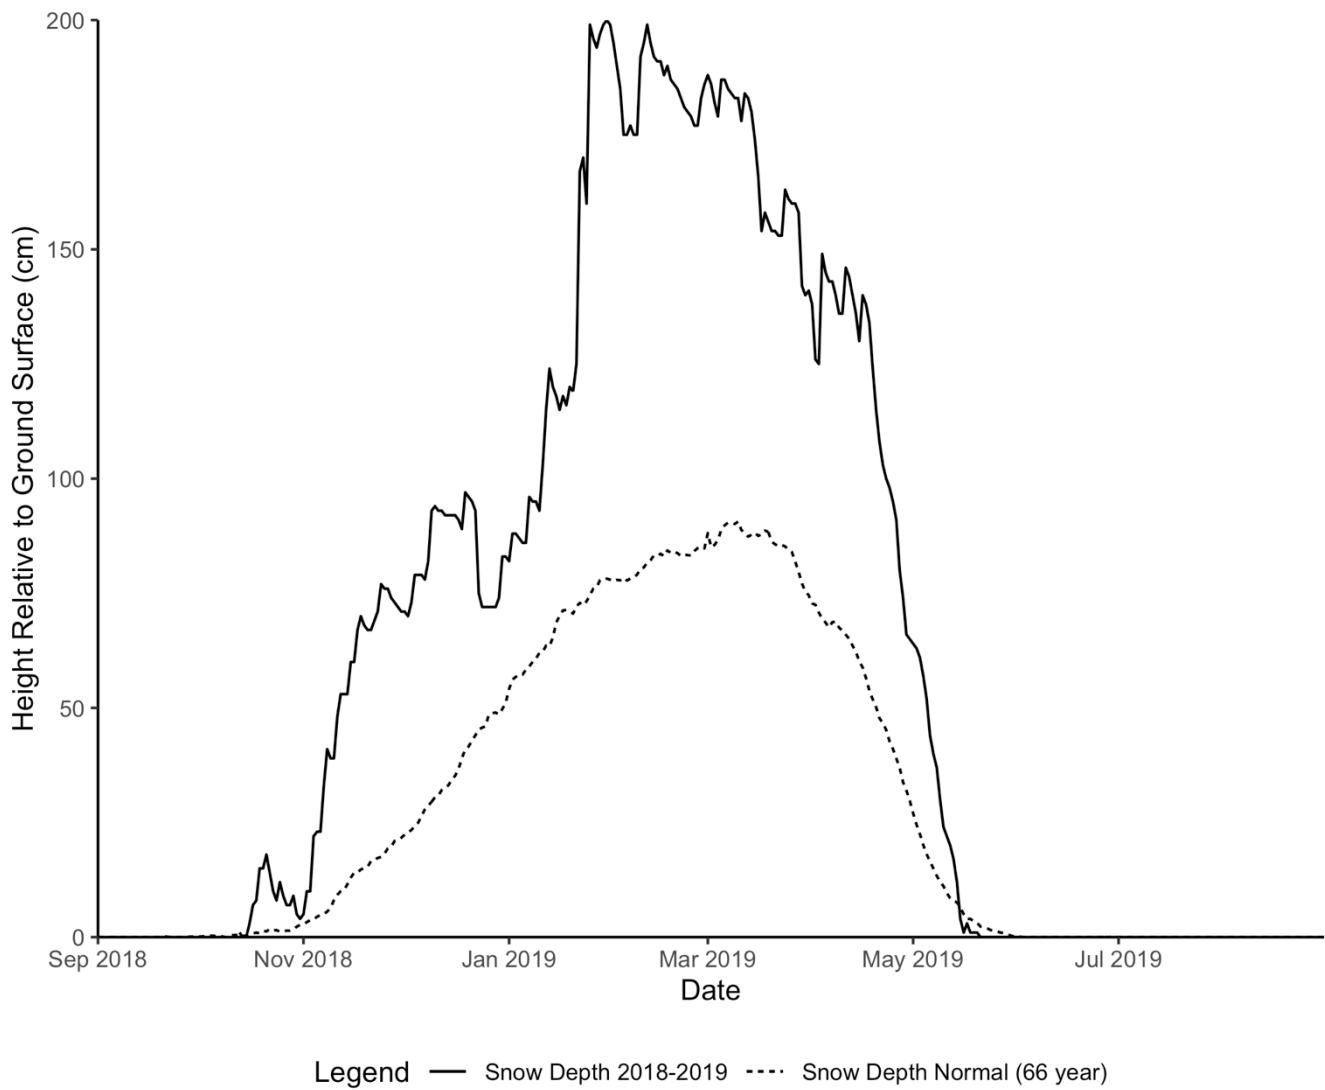

**Figure S5: Snow depth for winter 2018-2019 measured at Happy Valley-Goose Bay Airport relative to 66 year normal. The snow depth of winter 2018-2019 far exceeds regional averages and is considered an anomaly.**
